# Supplementary material for: A Non-Invasive Neonatal Signature Predicts Later Development of Atopic Diseases
Source: Preprints.org preprint supplement (doi:10.20944/preprints202203.0296.v1), 2022-03-22
Supplement: Supplementary file 1 [file supplementary]

## FIGURE LEGENDS

### Figure 1. Fecal extraction protocol.

Schematic representation of the protocol from stool protein extraction to evaluation of mediators and cytokines.

### Figure 2. Comparison of meconial calprotectin concentration according to the later occurrence of asthma or cow's milk allergy.

Results are expressed as median and interquartile range. Statistical test: Kruskal-Wallis.

### Figure 3. Principal component analysis of neonatal immune and archaeal biomarkers as a function of later occurrence of atopic conditions.

(A) Negative and significant ( $p < 0.001$ ) correlation ( $r = -0.64$ ) between the occurrence of atopic dermatitis with calprotectin, EDN and IL-1 $\beta$ . Strong positive and significant correlation ( $p < 0.01$ ) between calprotectin ( $r = 0.79$ ), EDN ( $r = 0.53$ ) and IL-1 $\beta$  ( $r = 0.51$ ). No correlation between Archaea CTs and other parameters. (B) Correlation between allergic events (asthma or cow's milk allergy) and atopic dermatitis. Strong positive and significant ( $p < 0.001$ ) correlation between IL-1 $\beta$  ( $r = 0.88$ ) and calprotectin ( $r = 0.82$ ), positive correlation between IL-6 ( $r = 0.62$ ) and EDN ( $r = 0.59$ ) significantly ( $p < 0.001$ ). Low positive ( $r < 0.5$ ) and significant correlation between Archaea CTs and biomarkers IL-1 $\beta$ , calprotectin, IL-6 and EDN. (C) Positive and significant correlation ( $p < 0.001$ ) between atopic dermatitis, allergic events with the markers calprotectin ( $r = 0.61$ ), IL-1 $\beta$  ( $r = 0.58$ ), EDN ( $r = 0.57$ ) and TGF- $\beta$  ( $r = 0.57$ ). Negative correlation between IL-6 ( $r = -0.71$ ), and IL-10 ( $r = -0.61$ ) with atopic dermatitis and allergic events. Positive and significant correlation between Archaea CTs with calprotectin, IL-1 $\beta$ , IL-6 and EDN. Negative correlation between Archaea Ct and allergic events. (D) Negative correlation between IL-6 ( $r = -0.51$ ) with other biomarkers and allergic events. Strong positive and significant correlation ( $p < 0.001$ ) between IL-1 $\beta$  ( $r = 0.68$ ), IL-10 ( $r = 0.67$ ) and atopic dermatitis ( $r = 0.58$ ). Low correlation ( $r < 0.5$ ) between Archaea CTs with

IL-1 $\beta$ , calprotectin, IL-6 and EDN. Negative correlation between allergic events and CTs of Archaea.

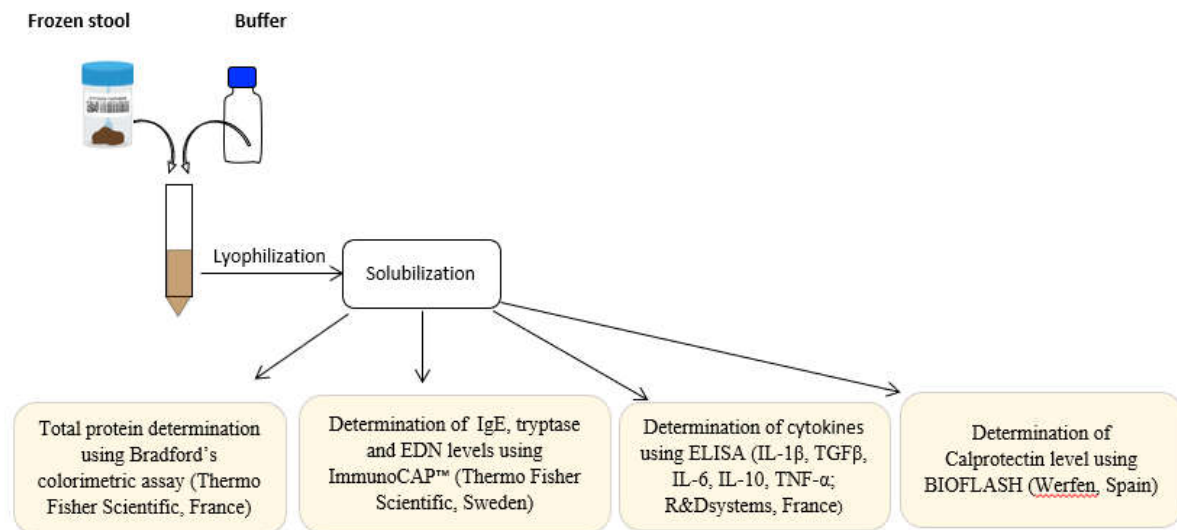

**Figure 1. Fecal extraction protocol.**

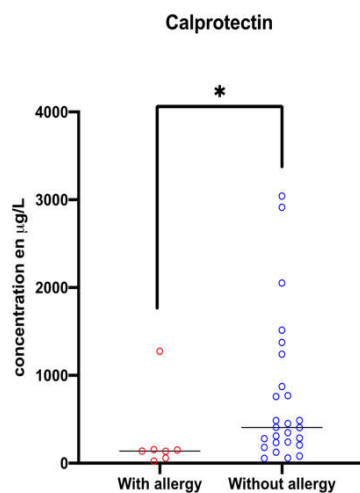

**Figure 2. Comparison of meconial calprotectin concentration according to the later occurrence of asthma or cow's milk allergy.**

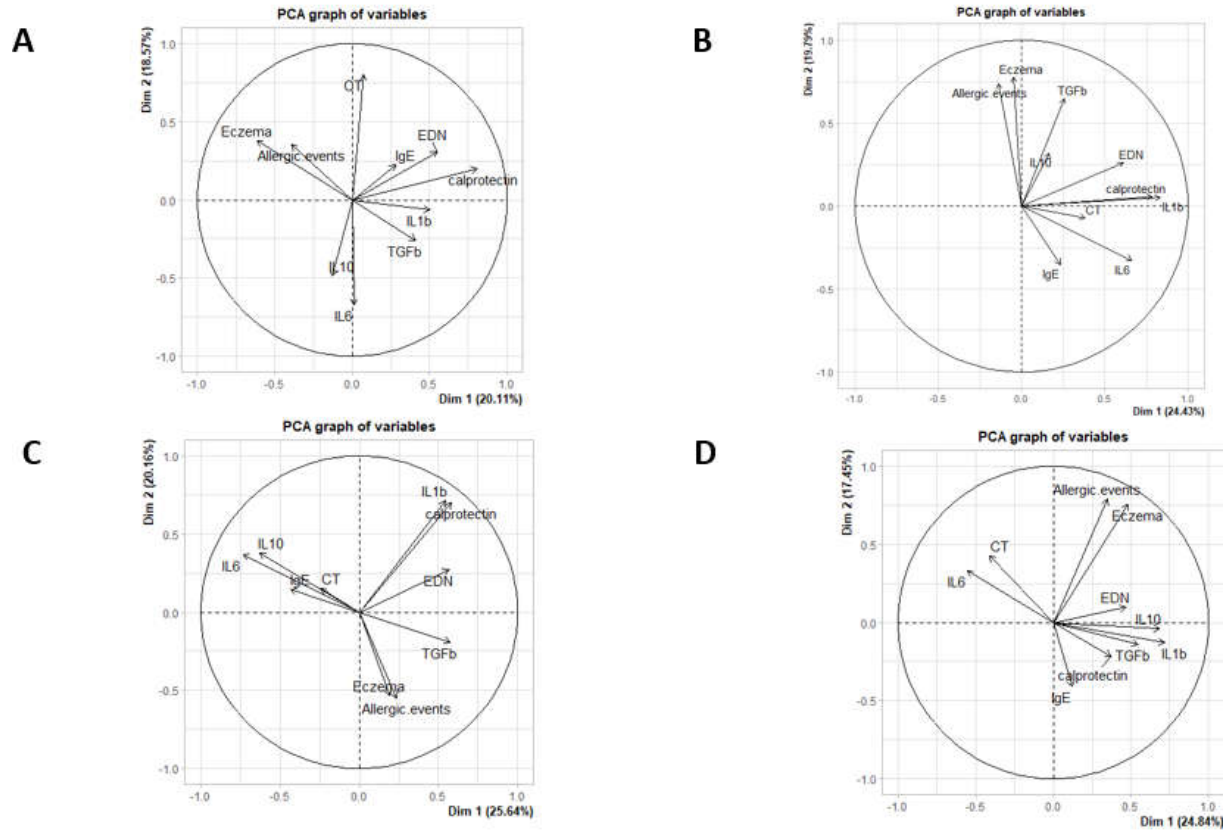

**Figure 3. Principal component analysis of neonatal immune and archaeal biomarkers as a function of later occurrence of atopic conditions.**

(A) Negative and significant ( $p < 0.001$ ) correlation ( $r = -0.64$ ) between the occurrence of atopic dermatitis with calprotectin, EDN and IL-1 $\beta$ . Strong positive and significant correlation ( $p < 0.01$ ) between calprotectin ( $r = 0.79$ ), EDN ( $0.53$ ) and IL-1b ( $0.51$ ). No correlation between Archaea TCs and other parameters. (B) Correlation between allergic events (asthma or cow's milk allergy) and atopic dermatitis. Strong positive and significant ( $p < 0.001$ ) correlation between IL-1b ( $r = 0.88$ ) and calprotectin ( $r = 0.82$ ), positive correlation between IL-6 ( $r = 0.62$ ) and EDN ( $r = 0.59$ ) significantly ( $p < 0.001$ ). Low positive ( $r < 0.5$ ) and significant correlation between Archaea TCs and biomarkers IL-1b, calprotectin, IL-6 and EDN. (C) Positive and significant correlation ( $p < 0.001$ ) between atopic dermatitis, allergic events with the markers Calprotectin ( $r = 0.61$ ), IL-1b ( $r = 0.58$ ), EDN ( $r = 0.57$ ) and TGF- $\beta$  ( $r = 0.57$ ). Negative correlation between IL-6 ( $r = -0.71$ ), and IL-10 ( $r = -0.61$ ) with atopic dermatitis and allergic events. Positive and significant correlation between Archaea TCs with calprotectin, IL-1b, IL-6 and EDN. Negative correlation between Archaea Ct and allergic events. (D) Negative correlation between IL-6 ( $r = -0.51$ ) with other biomarkers and allergic events. Strong positive and significant correlation ( $p < 0.001$ ) between IL-1b ( $r = 0.68$ ), IL-10 ( $r = 0.67$ ) and atopic dermatitis ( $r = 0.58$ ). Low correlation ( $r < 0.5$ ) between Archaea TCs with IL-1 $\beta$ , calprotectin, IL-6 and EDN. Negative correlation between allergic events and TC of Archaea.

## SUPPLEMENTARY TABLES

**Supplementary Table 1.** Comparison of biomarkers and CT of Archaea according to the presence or absence of maternal antibiotic therapy and according to the mode of delivery.

| Parameters   | Peripartum maternal antibiotic therapy | p-value | Mode of delivery | p-value |
|--------------|----------------------------------------|---------|------------------|---------|
|              |                                        |         |                  |         |
| CT Archaea   | Yes                                    | 0.69    | Cesarean section | 0.90    |
|              | No                                     |         | Vaginal delivery |         |
| IgE          | Yes                                    | 1       | Cesarean section | 0.98    |
|              | No                                     |         | Vaginal delivery |         |
| Tryptase     | Yes                                    | 0.43    | Cesarean section | 0.48    |
|              | No                                     |         | Vaginal delivery |         |
| Calprotectin | Yes                                    | 0.70    | Cesarean section | 0.07    |
|              | No                                     |         | Vaginal delivery |         |
| EDN          | Yes                                    | 0.83    | Cesarean section | 0.11    |
|              | No                                     |         | Vaginal delivery |         |
| TGF- $\beta$ | Yes                                    | 0.10    | Cesarean section | 0.40    |
|              | No                                     |         | Vaginal delivery |         |
| IL-1 $\beta$ | Yes                                    | 0.06    | Cesarean section | 0.61    |
|              | No                                     |         | Vaginal delivery |         |
| IL-10        | Yes                                    | 0.004   | Cesarean section | 0.16    |
|              | No                                     |         | Vaginal delivery |         |
| IL-6         | Yes                                    | 0.71    | Cesarean section | 0.71    |

**Supplementary Table 2.** Comparison of median CT of Archaea in preterm infants according to the presence or absence of allergic events during the first year of life.

| Periods    | CT Archaea      |      | p-value |
|------------|-----------------|------|---------|
|            | Allergic events |      |         |
|            | Yes             | No   |         |
| Meconium   | 37.7            | 36.3 | 0.98    |
| Two-weeks  | 36.2            | 37.2 | 0.28    |
| Four-weeks | 37.9            | 37.8 | 0.88    |
| Six-week   | 38.3            | 38.2 | 0.69    |

**Supplementary Table 3.** Comparison of median CTs of Archaea in preterm infants according to the presence or absence of atopic dermatitis during the first year of life.

| Periods    | CT Archaea        |      | p-value |
|------------|-------------------|------|---------|
|            | Atopic dermatitis |      |         |
|            | Yes               | No   |         |
| Meconium   | 36.3              | 36.7 | 0.66    |
| Two-weeks  | 37.2              | 37.1 | 0.89    |
| Four-weeks | 37.9              | 37.7 | 0.96    |
| Six-week   | 38.2              | 38.3 | 0.83    |
